# Supplementary material
Source: publisher figshare collection journal article supplement (https://frontiersin.figshare.com/ndownloader/files/23012324)

Figure 4C

Figure 4A

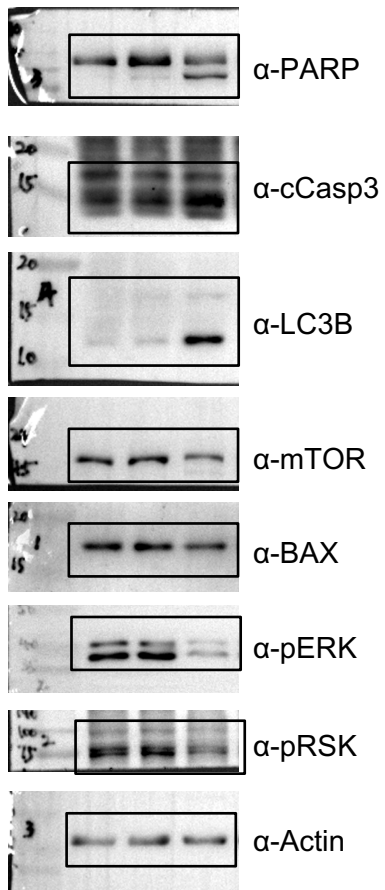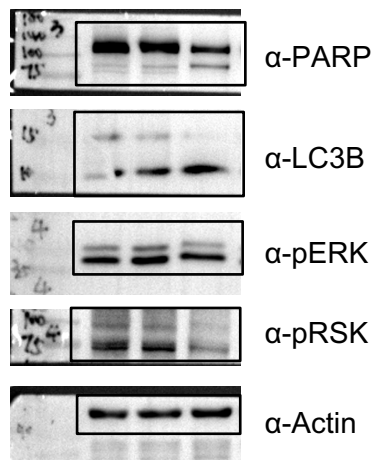

Figure 4F

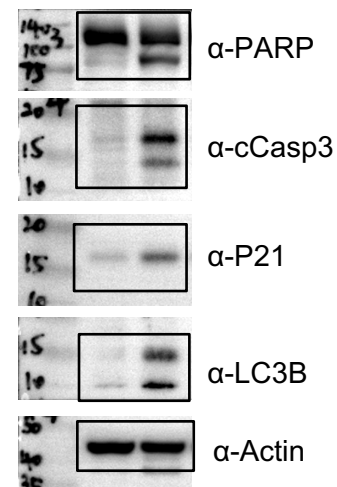

Figure 4E

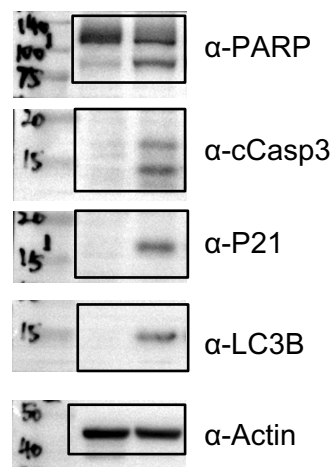

Figure 5B

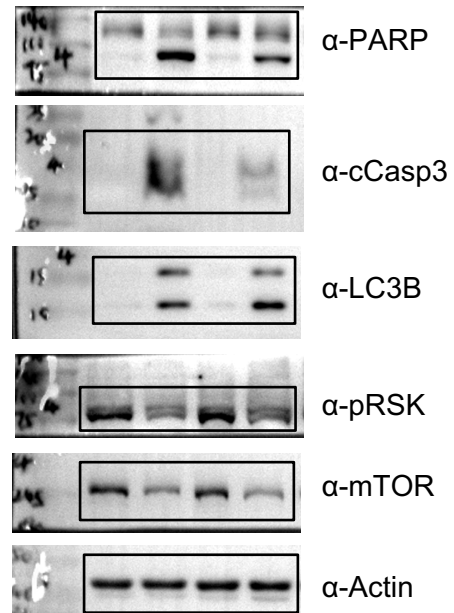

Figure 6A

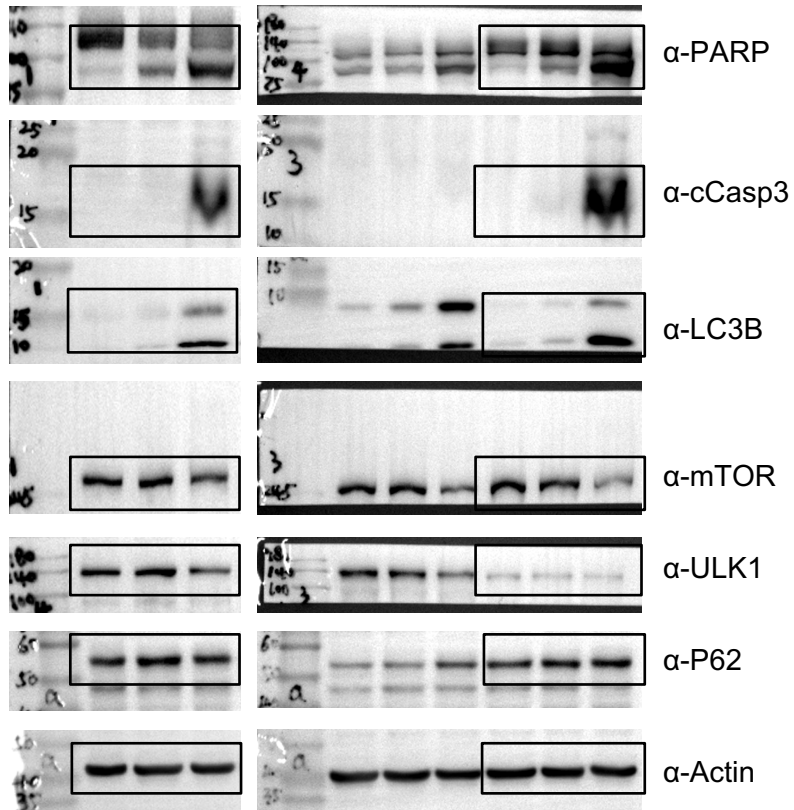

Figure 6C

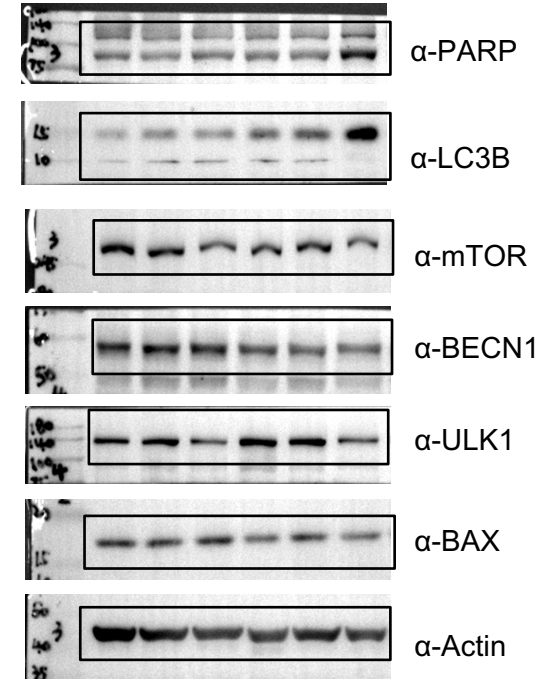

Figure 7B

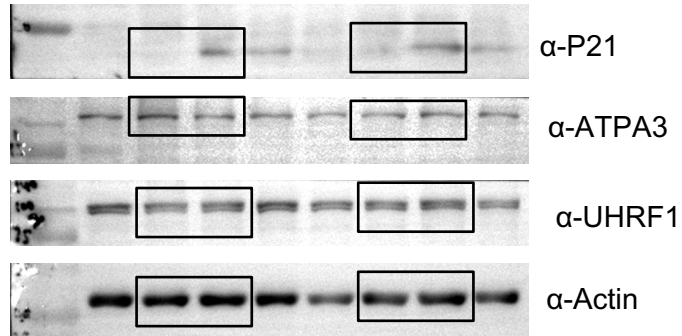

Figure 7D

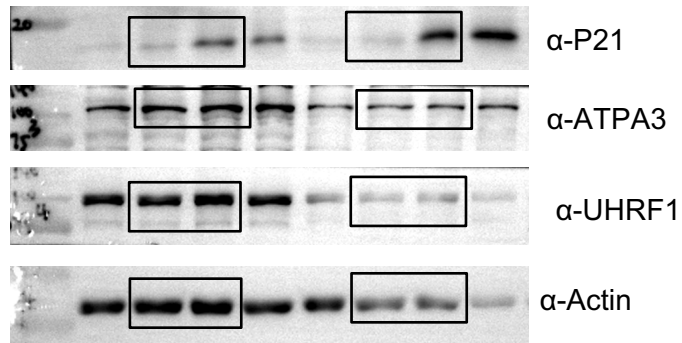

Supplement: Supplementary file [file 23012324]
